# Supplementary material for: Radiation protection effect of mobile shield barrier for the medical personnel during endoscopic retrograde cholangiopancreatography: a quasi-experimental prospective study
Source: PubMed Central journal article supplement — BMJ Open. 2019 Mar 20;9(3):e027729. doi: 10.1136/bmjopen-2018-027729 (PMC6527993; doi:10.1136/bmjopen-2018-027729), 2019-03-20
Supplement: bmjopen-2018-027729.draft_revisions.pdf [file bmjopen-2018-027729.draft_revisions.pdf]

# BMJ Open

BMJ Open is committed to open peer review. As part of this commitment we make the peer review history of every article we publish publicly available.

When an article is published we post the peer reviewers' comments and the authors' responses online. We also post the versions of the paper that were used during peer review. These are the versions that the peer review comments apply to.

The versions of the paper that follow are the versions that were submitted during the peer review process. They are not the versions of record or the final published versions. They should not be cited or distributed as the published version of this manuscript.

BMJ Open is an open access journal and the full, final, typeset and author-corrected version of record of the manuscript is available on our site with no access controls, subscription charges or pay-per-view fees (<http://bmjopen.bmj.com>).

If you have any questions on BMJ Open's open peer review process please email [info.bmjopen@bmj.com](mailto:info.bmjopen@bmj.com)

# BMJ Open

## Effect of Mobile Shield Barrier to Protect Medical Personnel during Endoscopic Retrograde Cholangiopancreatography.

|                               |                                                                                                                                                                                                                                                                                                                                                                                                                                                                     |
|-------------------------------|---------------------------------------------------------------------------------------------------------------------------------------------------------------------------------------------------------------------------------------------------------------------------------------------------------------------------------------------------------------------------------------------------------------------------------------------------------------------|
| Journal:                      | <i>BMJ Open</i>                                                                                                                                                                                                                                                                                                                                                                                                                                                     |
| Manuscript ID                 | bmjopen-2018-027729                                                                                                                                                                                                                                                                                                                                                                                                                                                 |
| Article Type:                 | Research                                                                                                                                                                                                                                                                                                                                                                                                                                                            |
| Date Submitted by the Author: | 19-Nov-2018                                                                                                                                                                                                                                                                                                                                                                                                                                                         |
| Complete List of Authors:     | Chung, Kwang Hyun; Eulji General Hospital, Eulji University School of Medicine, Department of Internal Medicine<br>Park, Young Sook; Eulji General Hospital, Eulji University School of Medicine, Department of Internal Medicine<br>Ahn, Sang Bong; Eulji General Hospital, Eulji University School of Medicine, Department of Internal Medicine<br>Son, Byoung Kwan; Eulji General Hospital, Eulji University School of Medicine, Department of Internal Medicine |
| Keywords:                     | Radiation Protection, Endoscopy < GASTROENTEROLOGY, Cholangiopancreatography, Endoscopic Retrograde, Protective Devices, thermoluminescence dosimetry, Fluoroscopy                                                                                                                                                                                                                                                                                                  |
|                               |                                                                                                                                                                                                                                                                                                                                                                                                                                                                     |

SCHOLARONE™  
Manuscripts

1  
2  
3  
4 **Title Page**  
5

6  
7 **Title:** Effect of Mobile Shield Barrier to Protect Medical Personnel during Endoscopic Retrograde  
8  
9 Cholangiopancreatography.  
10

11  
12  
13  
14  
15 **Running title:** Mobile Shield Barrier for Medical Personnel during ERCP  
16

17  
18  
19  
20  
21 **Authors**  
22

23  
24 Kwang Hyun Chung, M.D  
25

26  
27 Department of Internal Medicine, Eulji General Hospital, Eulji University School of Medicine, Seoul,  
28  
29 Republic of Korea.  
30

31  
32 E-mail: [kwasy@gmail.com](mailto:kwasy@gmail.com)  
33

34  
35  
36  
37  
38 Young Sook Park, M.D, Ph.D.  
39

40  
41 Department of Internal Medicine, Eulji General Hospital, Eulji University School of Medicine, Seoul,  
42  
43 Republic of Korea.  
44

45  
46 E-mail: [pys1109@eulji.ac.kr](mailto:pys1109@eulji.ac.kr)  
47

48  
49  
50  
51 Sang Bong Ahn, M.D, Ph.D.  
52

53  
54 Department of Internal Medicine, Eulji General Hospital, Eulji University School of Medicine, Seoul,  
55  
56 Republic of Korea.  
57

1  
2  
3  
4 [dr486@eulji.ac.kr](mailto:dr486@eulji.ac.kr)  
5  
6  
7  
8  
9

10 Byoung Kwan Son, M.D, Ph.D.  
11

12 Department of Internal Medicine, Eulji General Hospital, Eulji University School of Medicine, Seoul,  
13  
14 Republic of Korea.  
15

16  
17  
18 E-mail: [sbk1026@eulji.ac.kr](mailto:sbk1026@eulji.ac.kr)  
19  
20  
21  
22  
23

#### 24 **Corresponding author**

25  
26  
27 Byoung Kwan Son, M.D, Ph.D.  
28

29  
30 Professor of Department of Internal Medicine,  
31

32 Eulji Hospital, Eulji University College of Medicine,  
33

34  
35 68, Hangeulbiseok-ro, Nowon-gu, Seoul, Republic of Korea  
36  
37

38  
39 Tel: +82--2-970-8209 / Fax: +82-2-970-8621  
40

41  
42 E-mail: [sbk1026@eulji.ac.kr](mailto:sbk1026@eulji.ac.kr)  
43  
44  
45  
46  
47

#### 48 **Word counts**

49  
50 Title: 115 characters (including spaces)  
51

52  
53 Abstract: 298 words  
54

55  
56 Manuscript: 2333 words (excluding references)  
57

## Abstract

**Objective:** To investigate the effectiveness of radiation protection offered by a newly designed mobile shield barrier for medical personnel during endoscopic retrograde cholangiopancreatography (ERCP).

**Design:** Quasi-experimental prospective study

**Setting:** ERCP procedures conducted between October 2016 to June 2017 at a single secondary referral hospital that performs about 250 therapeutic ERCP procedures annually.

**Interventions:** A mobile shield barrier was a custom-made 2 mmPb shielding plate (width: 120 cm, height: 190 cm) with a 0.5 mmPb window (width: 115 cm, height: 60 cm) on its upper part was used. Four wheels were attached to the bottom to allow easy moving.

**Primary and secondary outcome measures:** The radiation doses were measured during ERCP using personal thermoluminescence dosimetry badges (TLD) on both sides of the mobile shield barrier (patient's side: TLD1 and medical staff's side: TLD2). The radiation doses were also measured on the outer surface of the thyroid shield of the endoscopist (TLD3), and on the chest area inside the protective apron of the endoscopist (TLD4) and the main assistant (TLD5). The TLD was changed and reported once every 3 months. The radiation dose measured by TLD badges were compared.

**Results:** During the study period, a total of 128 ERCP procedures were performed. The mean fluoroscopy time per procedure was  $244.9 \pm 257.0$  seconds and the mean number of digital radiographs per procedure was  $3.7 \pm 1.0$ . TLD1 (outside the barrier) had a mean radiation dose of  $26.85 \pm 3.47$  mSv and all the other TLDs (inside the barrier) had less than 1 mSv ( $P < 0.001$ ). In the post hoc analysis, the difference between TLD1 and others showed a statistical significance; however, there were no significant differences between the TLDs inside the barrier.

**Conclusion:** Our mobile shield barrier was useful to reduce the radiation exposure of medical personnel during ERCP.

## Article Summary

### Strengths and limitations of this study:

- Our newly designed mobile shield barrier is large enough to shield the entire body of the medical personnel.
- Wheels on the bottom of the shield barrier allows easy movement of the shield.
- The study period was relatively short (9 months) and the number of ERCP procedures was not very large.
- Comparisons of the radiation dose were performed only between the inside and outside of the mobile shield barrier and an independent control group was not established.
- The cumulative radiation dose was measured once every 3 months, without measuring the radiation dose for each ERCP procedure.

**Keywords:** Radiation Protection; Cholangiopancreatography, Endoscopic Retrograde; Protective Devices; thermoluminescence dosimetry; Fluoroscopy

## INTRODUCTION

Endoscopic retrograde cholangiopancreatography (ERCP) and its related procedures inevitably use ionizing radiation for imaging of the bile duct and pancreatic duct during the procedure, which poses a potential risk of radiation exposure of medical staff and patients[1]. The patient gains direct benefit from the procedure and is exposed to radiation only few times, whereas the medical staff are repeatedly exposed to radiation; therefore, more attention must be given to radiation protection for medical staff. To minimize the radiation exposure to patients and medical staff, the ALARA principle (as low as reasonably achievable) should be strictly followed and continuous monitoring of radiation exposure is required[2]. The International Commission on Radiological Protection recommends a maximum safe limit for the effective dose of 20 mSv/year (averaged over a defined 5-year period with no single year exceeding 50 mSv) for the whole body as well as for the eye,[3] and the Institute of Nuclear Safety of the Republic of Korea also applies this recommendation for the radiation dose limit for occupational exposure in planned exposure situations.

There are several factors that affect the radiation exposure of medical staffs during ERCP, one of which is the use of personal protective equipment and radiation protection shields[4]. However, use of these protection devices are often overlooked due to lack of awareness of radiation hazards and the discomfort of using protective devices. According to a survey conducted in the Republic of Korea in 2011, only 52.5% of endoscopists responded that they always wear thyroid shield, and 26.9% of them rarely or never wear it. Moreover, only 14% were lead glasses during the procedure and 69% never were it and the preparation rates of mobile shields or lead curtains were only 14% and 24%, respectively[5]. This propensity had not improved remarkably when a similar survey was conducted again in 2013[6]. It would be possible to reduce this tendency by creating shielding barriers that are easy to use and have excellent protection capabilities. Therefore, we designed a mobile shield barrier that could be placed between the patient and the medical staff while the fluoroscopy is being employed. The mobile barrier had the ability to shield the entire body of the medical staff during ERCP. The aim of this study was to

1  
2  
3  
4 verify the effectiveness of our mobile shield barrier.  
5  
6  
7  
8  
9

## 10 **MATERIALS AND METHODS**

### 11 **Study design**

12  
13  
14  
15  
16 This prospective quasi-experimental study was conducted in a secondary referral hospital which  
17 performs about 250 therapeutic ERCPs annually. The study period was between October 2016 and June  
18 2017 and all the patients were over 18 years of age. Information including patient demographics,  
19 indication of ERCP, fluoroscopy time, and number of digital radiographs was recorded at the time of  
20 the procedure. During the study period, radiation exposure doses were measured at every therapeutic  
21 ERCP procedures. The study was approved by the Institutional Review Board (protocol number:  
22 EMCIRB 2017-07-013) of Eulji Hospital. The study was investigator-initiated and received no external  
23 funding.  
24  
25  
26  
27  
28  
29  
30  
31  
32  
33  
34  
35  
36

### 37 **Endoscopic retrograde cholangiopancreatography**

38  
39 All procedures were performed by using a Sonalvision Safire 17 fluoroscopy system (Shimadzu, Japan)  
40 which is an overcouch X-ray system comprising a digital table (ZS-100i, Shimadzu, Japan, width: 76.5  
41 cm, height: 235 cm) and a high voltage X-ray generator (UD150BC-40, Shimadzu, Japan, 80kW)  
42 installed in 2011. The fluoroscopy mode was set as pulsed fluoroscopy with a rate of 30 frames per  
43 second. Fluoroscopy time was displayed on the monitor of the fluoroscopy controller. The entire ERCP  
44 procedure was performed under fluoroscopic guidance using a standard side-view duodenoscope (TJF-  
45 240, Olympus, Tokyo, Japan).  
46  
47  
48  
49  
50  
51  
52  
53  
54  
55  
56  
57  
58  
59  
60



### Mobile shield barrier

The mobile shield barrier was a custom-made 2 mmPb shield plate (width: 120 cm, height: 190 cm) with a 0.5 mmPb window (width: 115 cm, height: 60 cm) on the upper part. Four wheels were attached to the bottom to allow for easy moving. In order to facilitate the duodenoscope manipulation, a notch through which the shaft of the endoscope can be inserted was made on the side of the barrier. This mobile shield barrier was placed between patient and the medical staff, including the endoscopist and the assisting nurse while the fluoroscopy was employed (**Figure 1**). Each medical staff member wore a lead wrap-around protective apron (0.35-mm Pb), a thyroid shield (lead collar, 0.35-mm Pb), and lead goggles (0.75-mm Pb).

### Outcome measurement

The radiation exposure doses were measured by personal thermoluminescence dosimetry (TLD) badges (InLight® Quixel, Hanil Nuclear Co., Ltd., Republic of Korea) and were changed and reported every 3 months according to the Regulations for Safety Management of Diagnostic Radiation of the National Dose Registry (NDR), a part of the Korea Centers for Disease Control and Prevention (KCDC).

TLD badges were attached to the surface of the patient's side (TLD1) and the medical staff's side (TLD2) of the mobile shield barrier at the level of the medical staff's neck. TLD3 was attached on the outer surface of thyroid shield of endoscopist, and TLD4 and TLD5 were placed inside the protective apron at the level of the chest of endoscopist and that of the main assistant. The primary outcome of the study was the radiation dose measured by the TLD badge. TLD1 and TLD2 are almost in the same position, but TLD1 is closer to the x-ray generator by about 1 cm due to the thickness of the mobile shield barrier.

### Statistical analysis

Data are shown as the number (%) for categorical variables and the mean ( $\pm$  SD) for continuous variables. To compare the characteristics of the study groups, the chi-squared test or Fisher's exact test was used for categorical variables and the Student's t test was used for the continuous variables to compare two groups. We used one-way analysis of variance, followed by a post-hoc analysis using pairwise comparisons with Bonferroni adjustment to compare three or more groups, where appropriate. Double-sided *P*-values of  $< 0.05$  were considered statistically significant. All statistical analyses were conducted using the R software (R for Windows 3.5.1; The R Foundation for Statistical Computing, Vienna, Austria).

### Patient and public involvement

This research was done without patient involvement. Patients were not invited to comment on the study design and were not consulted to develop patient relevant outcomes or interpret the results. Patients were not invited to contribute to the writing or editing of this document for readability or accuracy.

## RESULTS

### Patients and procedure details

Patient characteristics and procedure details are described in **Table 1**.

**Table 1.** Patient and Procedural Characteristics

|          | <b>Total</b> | <b>1–3<br/>Months</b> | <b>4–6<br/>Months</b> | <b>7–9<br/>Months</b> | <b>P-value</b> |
|----------|--------------|-----------------------|-----------------------|-----------------------|----------------|
| <b>N</b> | 128          | 43                    | 47                    | 38                    |                |

|                                   |             |             |             |             |         |
|-----------------------------------|-------------|-------------|-------------|-------------|---------|
| <b>Age (years)(mean ± SD)</b>     | 69.6 ± 14.5 | 69.6 ± 11.9 | 68.7 ± 16.1 | 70.7 ± 15.2 | 0.818   |
| <b>Sex</b>                        |             |             |             |             | 0.248   |
| Male                              | 49 (39.1%)  | 17 (39.5%)  | 14 (29.8%)  | 18 (47.4%)  |         |
| Female                            | 79 (61.7%)  | 26 (60.5%)  | 33 (70.2%)  | 20 (52.6%)  |         |
| <b>Indication of ERCP (no, %)</b> |             |             |             |             | 0.541   |
| Bile duct stone                   | 78 (60.9%)  | 27 (62.8%)  | 30 (63.8%)  | 21 (55.3%)  |         |
| Bile duct cancer                  | 17 (13.3%)  | 6 (14.0%)   | 3 (6.4%)    | 8 (21.1%)   |         |
| Pancreatic cancer                 | 4 (3.1%)    | 0 (0.0%)    | 2 (4.3%)    | 2 (5.3%)    |         |
| Pancreatitis                      | 4 (3.1%)    | 2 (4.7%)    | 1 (2.1%)    | 1 (2.6%)    |         |
| Others                            | 25 (19.5%)  | 8 (18.6%)   | 11 (23.4%)  | 6 (15.8%)   |         |
| <b>Fluoroscopy time</b>           | 244.9 ±     | 254.6 ±     | 194.9 ±     | 295.7 ±     | 0.191   |
| (second)(mean ± SD)               | 257.0       | 354.5       | 156.9       | 217.7       |         |
| <b>No. of digital radiographs</b> | 3.7 ± 1.0   | 3.8 ± 1.2   | 3.3 ± 0.8   | 4.2 ± 0.9   | < 0.001 |
| (mean ± SD)                       |             |             |             |             |         |

During the study period, a total of 128 ERCP procedures were performed. The mean age of patients were  $69.6 \pm 14.5$  years. The indication for ERCP was mostly choledocholithiasis (60.9%). The mean fluoroscopy time per procedure was  $244.9 \pm 257.0$  seconds and the mean number of digital radiographs per procedure was  $3.7 \pm 1.0$ . The patient age, sex, and indications for ERCP were not significantly different in each 3-month period.

### Cumulative radiation exposure

The cumulative radiation exposure of each 3-month period is presented in **Table 2**.

### Table 2. Radiation Exposure

|                                                                               | <b>1–3</b>    | <b>4–6</b>    | <b>7–9</b>    |
|-------------------------------------------------------------------------------|---------------|---------------|---------------|
|                                                                               | <b>Months</b> | <b>Months</b> | <b>Months</b> |
| <b>Number of ERCP procedure</b>                                               | 43            | 47            | 38            |
| <b>Cumulative fluoroscopy time</b>                                            | 10949         | 9160          | 5966          |
| <b>Cumulative number of digital radiographs</b>                               | 165           | 153           | 158           |
| <b>Radiation dose (TLD1) (mSv)</b><br>– barrier surface, patient’s side       | 30.69         | 25.89         | 23.96         |
| <b>Radiation dose (TLD2) (mSv)</b><br>– barrier surface, medical staff’s side | 1.50          | 0.25          | 0.22          |
| <b>Radiation dose (TLD3) (mSv)</b><br>- on the thyroid shield                 | 0.34          | 0.16          | 0.15          |
| <b>Radiation dose (TLD4) (mSv)</b><br>- inside the lead apron, endoscopist    | 0.33          | 0.12          | 0.09          |
| <b>Radiation dose (TLD5) (mSv)</b><br>- inside the lead apron, nurse          | 0.14          | 0.10          | 0.08          |

The cumulative fluoroscopy time and digital radiograph number as well as the TLD doses were highest in the first 3-month period. The mean TLD result of each location is presented in **Figure 2**. TLD1 (outside the barrier) had a mean radiation dose of  $26.85 \pm 3.47$  mSv and all the rest of TLDs (inside the barrier) were less than 1 mSv ( $P < 0.001$ ). In the post hoc analysis, the difference between TLD1 and the others showed statistical significance ( $P < 0.001$ ); however, there were no significant differences between the TLDs inside the barrier ( $P = 1.000$ ).

## DISCUSSION

1  
2  
3  
4 Several methods are used for protecting medical personnel from radiation during ERCP, and personal  
5 protective equipment is one of the methods[4]. Personal protective equipment, however, does not cover  
6 the entire body; moreover, its heavy weight can cause musculoskeletal disorders and can sometimes be  
7 disregarded due to discomfort[4,5]. In this study, we showed that the amount of radiation reaching the  
8 medical staff can be drastically reduced by using a mobile shield barrier. In addition, even inside the  
9 shielding barrier, there is no significant difference between the radiation doses reaching the inside and  
10 outside of the personal protective equipment.  
11  
12  
13  
14  
15  
16  
17  
18

19  
20 The idea of using a protective shield to protect medical staff from radiation during ERCP has been  
21 around for a long time. In 1996, Chen et al.[7] attempted to reduce the radiation exposure of medical  
22 personnel by using a 0.5 mm lead acrylic shield that hangs from the ceiling and could be placed between  
23 the patient and the endoscopist, which significantly reduced the radiation exposure of the endoscopist  
24 from 2.5 mR to 0.27 mR per procedure. In 2002, Johlin et al.[8] used a phantom model to demonstrate  
25 that a curtain of beads fashioned as a shield could reduce the radiation exposure of medical staff during  
26 ERCP. More recently, in 2011, Kim et al.[9] used a curtain-shaped protective shield composed of seven  
27 movable lead plates to reduce radiation. Several other studies have attempted to attach lead shields  
28 directly to X-ray tubes[10-12] or image intensifiers[13]. The above-mentioned studies commonly used  
29 a method of hanging a radiation protective shield from above, similar to a curtain. In contrast, our  
30 protective shield is set on the floor which has less weight-related constraints; thus, we are able to utilize  
31 a shield that is bigger than that used in previous studies to cover a wider range. Another point to consider  
32 is that manipulation of the duodenoscope may be interrupted by the shielding barrier. We solved this  
33 problem by putting wheels on the bottom of the shield barrier to allow easy movement of the shield and  
34 a small notch was incorporated on the side to acquire space for movement of the duodenoscope shaft.  
35 We placed the shield barrier between the patient and medical staff only when using the fluoroscopy;  
36 during most of the time that the duodenoscope was manipulated, the shield barrier was moved slightly  
37 to one side so as not to interfere with the duodenoscope manipulation. In addition, ancillary effects are  
38  
39  
40  
41  
42  
43  
44  
45  
46  
47  
48  
49  
50  
51  
52  
53  
54  
55  
56  
57  
58  
59  
60

1  
2  
3  
4 expected to reduce unnecessary fluoroscopy time.  
5  
6

7 The amount of radiation the medical staff receives over a period is affected by various factors. The  
8 physical environment of the ERCP unit, the distance between medical staff and the radiation source or  
9 the patient, the type of X-ray system (over-couch, under-couch, or mobile C-arm unit), the fluoroscopy  
10 parameters (use of pulsed rather than continuous fluoroscopy, number of radiographs, use of collimation  
11 of X-ray beam, use of low magnification), and the use of protective equipment can affect the radiation  
12 dose[4,14-16]. Moreover, the fluoroscopy time is determined by important factors such as the difficulty  
13 of the procedure,[17] the proficiency level of the endoscopist and the assistant,[18] education and  
14 awareness regarding radiation protection,[19,20] and the number of ERCP procedures during the period.  
15 Hence, the different scenarios at each institution and those of the ERCP units should be taken into  
16 account when comparing the degree of radiation exposure for each institution.  
17  
18  
19  
20  
21  
22  
23  
24  
25  
26  
27  
28

29 The fluoroscopy time per procedure in our study is approximately 4 minutes which is not significantly  
30 different from the fluoroscopy times of previous studies (5.32 to 14.5 minutes)[10,13,14]. The actual  
31 radiation dose received by medical personnel may differ from the radiation dose measured by the TLD;  
32 nonetheless, the radiation dose outside the mobile shield barrier exceeded 80 mSv only in 9 months.  
33 According to the results of our study alone, the amount of radiation exposure in areas without protective  
34 equipment is more than 150 mSv when we perform 250 ERCPs per year without shielding barriers. As  
35 this level is high, a more aggressive protection strategy is warranted, and our mobile shield barrier could  
36 be a possible solution.  
37  
38  
39  
40  
41  
42  
43  
44  
45  
46

47 Our study had a few limitations. Our study was conducted for a relatively short period of 9 months and  
48 the number of ERCPs was not very large. In addition, only the radiation dose inside and outside the  
49 mobile shield barrier was compared without setting the independent control group without a mobile  
50 shield barrier. However, we showed reduction of the radiation dose by approximately 1/40 using the  
51 mobile shield barrier, which demonstrates remarkable efficacy and not only just a statistical difference.  
52  
53  
54  
55  
56  
57  
58  
59  
60

Moreover, the radiation doses between the TLDs inside the mobile shield barrier were not significantly different, and this can help reduce the role of personal protective equipment.

In conclusion, radiation exposure is inevitable during ERCP and this can cause various health problems in medical personnel. It is essential to lower the radiation exposure by as much as possible and various protective equipment or devices should be used appropriately. Our mobile shield barrier was found to be extremely effective for reducing radiation exposure and could be one of the options for protecting medical personnel from radiation exposure during ERCP.

#### **ACKNOWLEDGMENTS**

None

#### **STATEMENT OF COMPETING INTERESTS**

None declared

#### **FUNDING**

This research received no specific grant from any funding agency in the public, commercial or not-for-profit sectors.

#### **AUTHOR CONTRIBUTIONS**

BKS contributed to the concept and design of the study. He also drafted the initial manuscript. KHC

1  
2  
3  
4 critically reviewed the research protocol and contributed to analyzing of data and writing of the  
5 manuscript. YSP and SBA contributed to the data interpretation, and critically revised the manuscript.  
6  
7  
8 All authors were involved in editing the manuscript. All authors read and approved the final manuscript.  
9  
10  
11  
12  
13

#### 14 **Patient consent**

15 Not required.  
16  
17  
18  
19

---

#### 20 **ETHICAL APPROVAL**

21  
22  
23 The study protocol was approved by the institutional review board of Eulji General Hospital (protocol  
24 number: EMCIRB 2017-07-013).  
25  
26  
27  
28  
29  
30  
31  
32  
33

#### 34 **DATA SHARING STATEMENT**

35 All available data can be obtained from the corresponding author.  
36  
37  
38  
39

#### 40 **References**

- 41  
42  
43 1. Tsapaki V, Paraskeva KD, Mathou N, et al. Patient and endoscopist radiation doses during  
44 ERCP procedures. *Radiat Prot Dosimetry* 2011;147:111-3.  
45  
46 2. Campbell N, Sparrow K, Fortier M, et al. Practical radiation safety and protection for the  
47 endoscopist during ERCP. *Gastrointest Endosc* 2002;55:552-7.  
48  
49 3. Rehani M, Ciraj-Bjelac O, Vaňó E, et al. Radiological protection in fluoroscopically guided  
50 procedures performed outside the imaging department. *Annals of the ICRP* 2010;40:1-102.  
51  
52 4. Dumonceau JM, Garcia-Fernandez FJ, Verdun FR, et al. Radiation protection in digestive  
53 endoscopy: European Society of Digestive Endoscopy (ESGE) guideline. *Endoscopy*  
54 2012;44:408-21.  
55  
56 5. Son BK, Lee KT, Kim JS, et al. Lack of radiation protection for endoscopists performing  
57  
58  
59  
60



- 1
- 2
- 3
- 4
- 5 endoscopic retrograde cholangiopancreatography. *Korean J Gastroenterol* 2011;58:93-9.
- 6 6. Shin JM, Lee TH, Park SH, et al. A Survey of the Radiation Exposure Protection of Health
- 7 Care Providers during Endoscopic Retrograde Cholangiopancreatography in Korea. *Gut Liver*
- 8 2013;7:100-5.
- 9
- 10 7. Chen MY, Van Swearingen FL, Mitchell R, et al. Radiation exposure during ERCP: effect of a
- 11 protective shield. *Gastrointest Endosc* 1996;43:1-5.
- 12
- 13 8. Johlin FC, Pelsang RE, Greenleaf M. Phantom study to determine radiation exposure to
- 14 medical personnel involved in ERCP fluoroscopy and its reduction through equipment and
- 15 behavior modifications. *Am J Gastroenterol* 2002;97:893-7.
- 16
- 17 9. Kim YJ, Cho KB, Kim ES, et al. [Efficacy of a self-designed protective lead shield in reduction
- 18 of radiation exposure dose during endoscopic retrograde cholangiopancreatography].
- 19 *Korean J Gastroenterol* 2011;57:28-33.
- 20
- 21 10. Minami T, Sasaki T, Serikawa M, et al. Occupational Radiation Exposure during Endoscopic
- 22 Retrograde Cholangiopancreatography and Usefulness of Radiation Protective Curtains.
- 23 *Gastroenterol Res Pract* 2014;2014:926876.
- 24
- 25 11. Mori H, Koshida K, Ishigamori O, et al. A novel removable shield attached to C-arm units
- 26 against scattered X-rays from a patient's side. *Eur Radiol* 2014;24:1794-9.
- 27
- 28 12. Morishima Y, Chida K, Meguro T. Effectiveness of additional lead shielding to protect staff
- 29 from scattering radiation during endoscopic retrograde cholangiopancreatography
- 30 procedures. *J Radiat Res* 2018;59:225-32.
- 31
- 32 13. Muniraj T, Aslanian HR, Laine L, et al. A double-blind, randomized, sham-controlled trial of
- 33 the effect of a radiation-attenuating drape on radiation exposure to endoscopy staff during
- 34 ERCP. *Am J Gastroenterol* 2015;110:690-6.
- 35
- 36 14. Jowhari F, Hopman WM, Hookey L. A simple ergonomic measure reduces fluoroscopy time
- 37 during ERCP: A multivariate analysis. *Endosc Int Open* 2017;5:E172-E8.
- 38
- 39 15. Churrango G, Deutsch JK, Dinneen HS, et al. Minimizing Radiation Exposure During ERCP
- 40 by Avoiding Live or Continuous Fluoroscopy. *J Clin Gastroenterol* 2015;49:e96-100.
- 41
- 42 16. Tsapaki V, Paraskeva KD, Tsalafoutas IA, et al. The Impact of X-Ray Unit Type Used for
- 43 Endoscopic Retrograde Cholangiopancreatography Procedures on Patient Doses. *Radiat*
- 44 *Prot Dosimetry* 2016;171:503-8.
- 45
- 46 17. Saukko E, Gronroos JM, Salminen P, et al. Patient radiation dose and fluoroscopy time during
- 47 ERCP: a single-center, retrospective study of influencing factors. *Scand J Gastroenterol*
- 48 2018;53:495-504.
- 49
- 50 18. Liao C, Thosani N, Kothari S, et al. Radiation exposure to patients during ERCP is significantly
- 51 higher with low-volume endoscopists. *Gastrointest Endosc* 2015;81:391-8 e1.
- 52
- 53 19. Barakat MT, Thosani NC, Huang RJ, et al. Effects of a Brief Educational Program on
- 54 Optimization of Fluoroscopy to Minimize Radiation Exposure During Endoscopic Retrograde
- 55
- 56
- 57
- 58
- 59
- 60

1  
2  
3  
4  
5  
6  
7  
8  
9  
10  
11  
12  
13  
14  
15  
16  
17  
18  
19  
20  
21  
22  
23  
24  
25  
26  
27  
28  
29  
30  
31  
32  
33  
34  
35  
36  
37  
38  
39  
40  
41  
42  
43  
44  
45  
46  
47  
48  
49  
50  
51  
52  
53  
54  
55  
56  
57  
58  
59  
60

Cholangiopancreatography. *Clin Gastroenterol Hepatol* 2018;16:550-7.

20. Zeng HZ, Liu Q, Chen HL, et al. A pilot single-center prospective randomized trial to assess the short-term effect of a flashing warning light on reducing fluoroscopy time and radiation exposure during ERCP. *Gastrointest Endosc* 2018;88:261-6.

For peer review only

1  
2  
3  
4 **Figure legends**  
5

6  
7 **Figure 1.** ERCP room and mobile shield barrier. (a) Size and shape of mobile shield barrier. (b)  
8 Arrangement of fluoroscopy tube, table, endoscopic instruments, and mobile shield barrier in the ERCP  
9 room. Locations of thermoluminescence dosimetry badges are indicated by circled numbers. E:  
10 endoscopist, A: assistant. (c) Photo of ERCP room and mobile shield barrier.  
11  
12  
13  
14

15  
16 **Figure 2.** Box plot of thermoluminescence dosimetry value at different locations. Each number  
17 represents the mean value.  
18  
19  
20  
21  
22  
23  
24  
25  
26  
27  
28  
29  
30  
31  
32  
33  
34  
35  
36  
37  
38  
39  
40  
41  
42  
43  
44  
45  
46  
47  
48  
49  
50  
51  
52  
53  
54  
55  
56  
57  
58  
59  
60

1  
2  
3  
4  
5  
6  
7  
8  
9  
10  
11  
12  
13  
14  
15  
16  
17  
18  
19  
20  
21  
22  
23  
24  
25  
26  
27  
28  
29  
30  
31  
32  
33  
34  
35  
36  
37  
38  
39  
40  
41

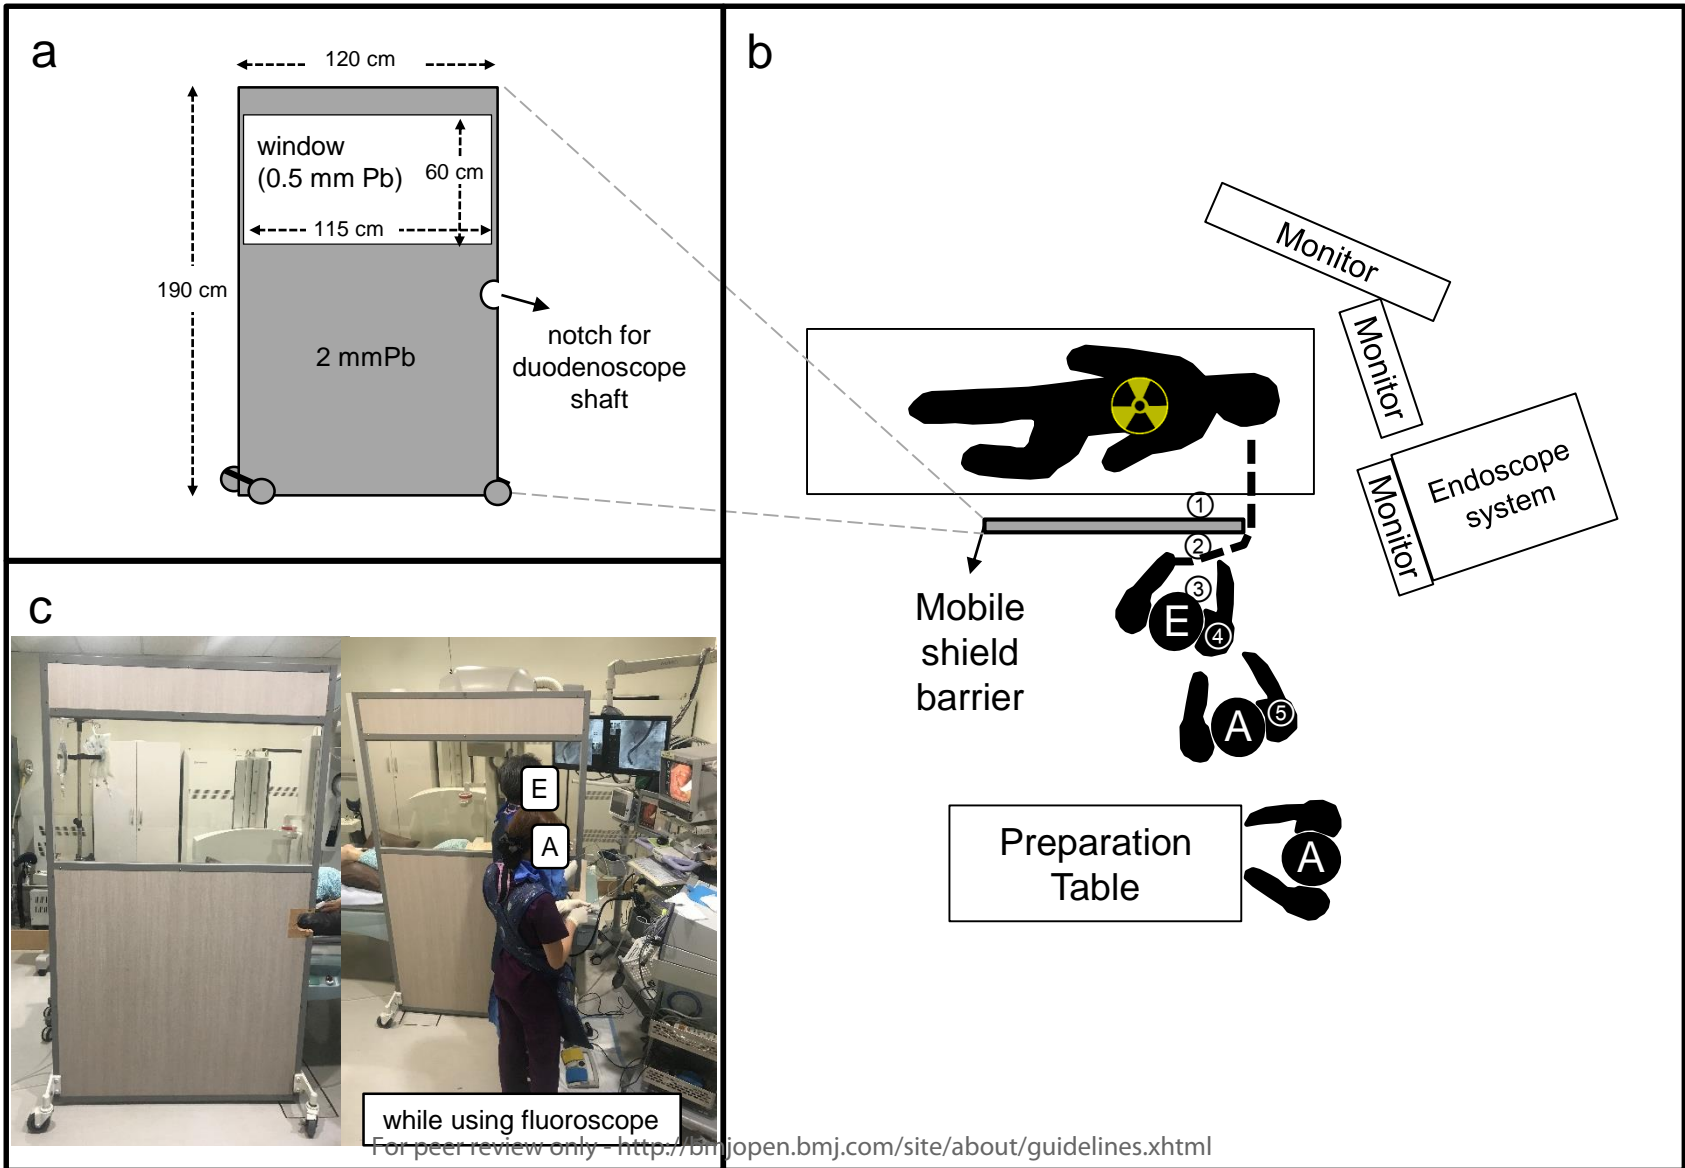

1  
2  
3  
4  
5  
6  
7  
8  
9  
10  
11  
12  
13  
14  
15  
16  
17  
18  
19  
20  
21  
22  
23  
24  
25  
26  
27  
28  
29  
30  
31  
32  
33  
34  
35  
36  
37  
38  
39  
40  
41

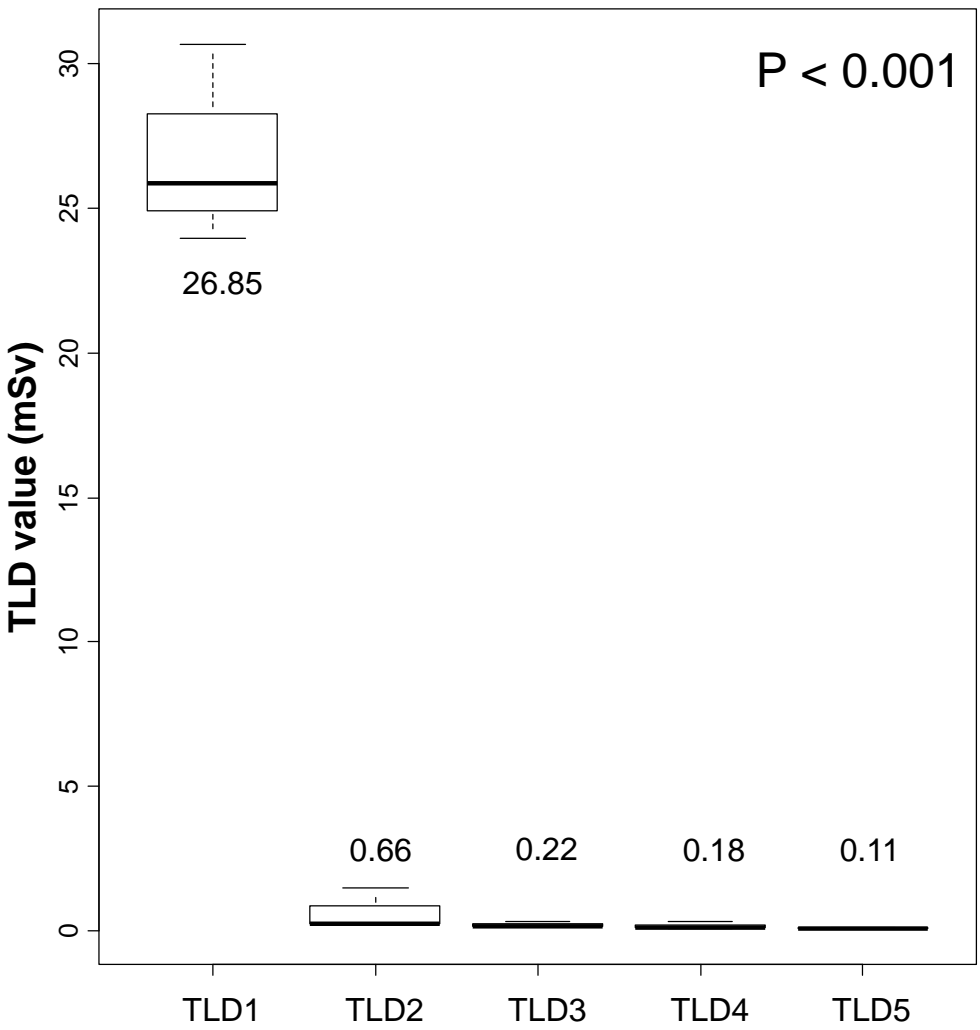

**P-values of pairwise comparisons using Bonferroni adjustment**  
 TLD 1 vs. TLD 2, TLD 1 vs. TLD 3, TLD 1 vs. TLD 4, TLD 1 vs. TLD 5;  $P < 0.001$   
 TLD 2 vs. TLD 3, TLD 2 vs. TLD 4, TLD 2 vs. TLD 5;  $P = 1.000$   
 TLD 3 vs. TLD 4, TLD 3 vs. TLD 5;  $P = 1.000$   
 TLD 4 vs. TLD 5;  $P = 1.000$

**STROBE 2007 (v4) checklist of items to be included in reports of observational studies in epidemiology\***  
**Checklist for cohort, case-control, and cross-sectional studies (combined)**

| Section/Topic             | Item # | Recommendation                                                                                                                                                                                                                                                                                                                                                                                                                                                         | Reported on page # |
|---------------------------|--------|------------------------------------------------------------------------------------------------------------------------------------------------------------------------------------------------------------------------------------------------------------------------------------------------------------------------------------------------------------------------------------------------------------------------------------------------------------------------|--------------------|
| Title and abstract        | 1      | (a) Indicate the study's design with a commonly used term in the title or the abstract                                                                                                                                                                                                                                                                                                                                                                                 | #3                 |
|                           |        | (b) Provide in the abstract an informative and balanced summary of what was done and what was found                                                                                                                                                                                                                                                                                                                                                                    | #3                 |
| <b>Introduction</b>       |        |                                                                                                                                                                                                                                                                                                                                                                                                                                                                        |                    |
| Background/rationale      | 2      | Explain the scientific background and rationale for the investigation being reported                                                                                                                                                                                                                                                                                                                                                                                   | #5                 |
| Objectives                | 3      | State specific objectives, including any pre-specified hypotheses                                                                                                                                                                                                                                                                                                                                                                                                      | #5-6               |
| <b>Methods</b>            |        |                                                                                                                                                                                                                                                                                                                                                                                                                                                                        |                    |
| Study design              | 4      | Present key elements of study design early in the paper                                                                                                                                                                                                                                                                                                                                                                                                                | #6                 |
| Setting                   | 5      | Describe the setting, locations, and relevant dates, including periods of recruitment, exposure, follow-up, and data collection                                                                                                                                                                                                                                                                                                                                        | #6                 |
| Participants              | 6      | (a) <i>Cohort study</i> —Give the eligibility criteria, and the sources and methods of selection of participants. Describe methods of follow-up<br><i>Case-control study</i> —Give the eligibility criteria, and the sources and methods of case ascertainment and control selection. Give the rationale for the choice of cases and controls<br><i>Cross-sectional study</i> —Give the eligibility criteria, and the sources and methods of selection of participants | #7                 |
|                           |        | (b) <i>Cohort study</i> —For matched studies, give matching criteria and number of exposed and unexposed<br><i>Case-control study</i> —For matched studies, give matching criteria and the number of controls per case                                                                                                                                                                                                                                                 | N/A                |
| Variables                 | 7      | Clearly define all outcomes, exposures, predictors, potential confounders, and effect modifiers. Give diagnostic criteria, if applicable                                                                                                                                                                                                                                                                                                                               | #7                 |
| Data sources/ measurement | 8*     | For each variable of interest, give sources of data and details of methods of assessment (measurement). Describe comparability of assessment methods if there is more than one group                                                                                                                                                                                                                                                                                   | #7                 |
| Bias                      | 9      | Describe any efforts to address potential sources of bias                                                                                                                                                                                                                                                                                                                                                                                                              | N/A                |
| Study size                | 10     | Explain how the study size was arrived at                                                                                                                                                                                                                                                                                                                                                                                                                              | N/A                |
| Quantitative variables    | 11     | Explain how quantitative variables were handled in the analyses. If applicable, describe which groupings were chosen and why                                                                                                                                                                                                                                                                                                                                           | #7-8               |
| Statistical methods       | 12     | (a) Describe all statistical methods, including those used to control for confounding                                                                                                                                                                                                                                                                                                                                                                                  | #7-8               |
|                           |        | (b) Describe any methods used to examine subgroups and interactions                                                                                                                                                                                                                                                                                                                                                                                                    | N/A                |
|                           |        | (c) Explain how missing data were addressed                                                                                                                                                                                                                                                                                                                                                                                                                            | N/A                |
|                           |        | (d) <i>Cohort study</i> —If applicable, explain how loss to follow-up was addressed<br><i>Case-control study</i> —If applicable, explain how matching of cases and controls was addressed                                                                                                                                                                                                                                                                              | N/A                |

|                          |     |                                                                                                                                                                                                              |        |
|--------------------------|-----|--------------------------------------------------------------------------------------------------------------------------------------------------------------------------------------------------------------|--------|
|                          |     | <i>Cross-sectional study</i> —If applicable, describe analytical methods taking account of sampling strategy                                                                                                 |        |
|                          |     | (e) Describe any sensitivity analyses                                                                                                                                                                        | N/A    |
| <b>Results</b>           |     |                                                                                                                                                                                                              |        |
| Participants             | 13* | (a) Report numbers of individuals at each stage of study—eg numbers potentially eligible, examined for eligibility, confirmed eligible, included in the study, completing follow-up, and analysed            | #8-9   |
|                          |     | (b) Give reasons for non-participation at each stage                                                                                                                                                         | N/A    |
|                          |     | (c) Consider use of a flow diagram                                                                                                                                                                           | N/A    |
| Descriptive data         | 14* | (a) Give characteristics of study participants (eg demographic, clinical, social) and information on exposures and potential confounders                                                                     | #8-10  |
|                          |     | (b) Indicate number of participants with missing data for each variable of interest                                                                                                                          | #8     |
|                          |     | (c) <i>Cohort study</i> —Summarise follow-up time (eg, average and total amount)                                                                                                                             | N/A    |
| Outcome data             | 15* | <i>Cohort study</i> —Report numbers of outcome events or summary measures over time                                                                                                                          | #9-10  |
|                          |     | <i>Case-control study</i> —Report numbers in each exposure category, or summary measures of exposure                                                                                                         |        |
|                          |     | <i>Cross-sectional study</i> —Report numbers of outcome events or summary measures                                                                                                                           |        |
| Main results             | 16  | (a) Give unadjusted estimates and, if applicable, confounder-adjusted estimates and their precision (eg, 95% confidence interval). Make clear which confounders were adjusted for and why they were included | #9-10  |
|                          |     | (b) Report category boundaries when continuous variables were categorized                                                                                                                                    | #9-10  |
|                          |     | (c) If relevant, consider translating estimates of relative risk into absolute risk for a meaningful time period                                                                                             | N/A    |
| Other analyses           | 17  | Report other analyses done—eg analyses of subgroups and interactions, and sensitivity analyses                                                                                                               | N/A    |
| <b>Discussion</b>        |     |                                                                                                                                                                                                              |        |
| Key results              | 18  | Summarise key results with reference to study objectives                                                                                                                                                     | #10-11 |
| Limitations              | 19  | Discuss limitations of the study, taking into account sources of potential bias or imprecision. Discuss both direction and magnitude of any potential bias                                                   | #12    |
| Interpretation           | 20  | Give a cautious overall interpretation of results considering objectives, limitations, multiplicity of analyses, results from similar studies, and other relevant evidence                                   | #11-12 |
| Generalisability         | 21  | Discuss the generalisability (external validity) of the study results                                                                                                                                        | #1-13  |
| <b>Other information</b> |     |                                                                                                                                                                                                              |        |
| Funding                  | 22  | Give the source of funding and the role of the funders for the present study and, if applicable, for the original study on which the present article is based                                                | #13    |

\*Give information separately for cases and controls in case-control studies and, if applicable, for exposed and unexposed groups in cohort and cross-sectional studies.

**Note:** An Explanation and Elaboration article discusses each checklist item and gives methodological background and published examples of transparent reporting. The STROBE checklist is best used in conjunction with this article (freely available on the Web sites of PLoS Medicine at <http://www.plosmedicine.org/>, Annals of Internal Medicine at <http://www.annals.org/>, and Epidemiology at <http://www.epidem.com/>). Information on the STROBE Initiative is available at [www.strobe-statement.org](http://www.strobe-statement.org).

# BMJ Open

## Radiation Protection Effect of Mobile Shield Barrier for the Medical Personnel during Endoscopic Retrograde Cholangiopancreatography: a Quasi-experimental Prospective Study

|                                 |                                                                                                                                                                                                                                                                                                                                                                                                                                                            |
|---------------------------------|------------------------------------------------------------------------------------------------------------------------------------------------------------------------------------------------------------------------------------------------------------------------------------------------------------------------------------------------------------------------------------------------------------------------------------------------------------|
| Journal:                        | <i>BMJ Open</i>                                                                                                                                                                                                                                                                                                                                                                                                                                            |
| Manuscript ID                   | bmjopen-2018-027729.R1                                                                                                                                                                                                                                                                                                                                                                                                                                     |
| Article Type:                   | Research                                                                                                                                                                                                                                                                                                                                                                                                                                                   |
| Date Submitted by the Author:   | 11-Jan-2019                                                                                                                                                                                                                                                                                                                                                                                                                                                |
| Complete List of Authors:       | Chung, Kwang Hyun; Eulji General Hospital, Eulji University School of Medicine, Department of Internal Medicine Park, Young Sook; Eulji General Hospital, Eulji University School of Medicine, Department of Internal Medicine Ahn, Sang Bong; Eulji General Hospital, Eulji University School of Medicine, Department of Internal Medicine Son, Byoung Kwan; Eulji General Hospital, Eulji University School of Medicine, Department of Internal Medicine |
| <b>Primary Subject Heading</b>: | Gastroenterology and hepatology                                                                                                                                                                                                                                                                                                                                                                                                                            |
| Secondary Subject Heading:      | Radiology and imaging                                                                                                                                                                                                                                                                                                                                                                                                                                      |
| Keywords:                       | Radiation Protection, Endoscopy < GASTROENTEROLOGY, Cholangiopancreatography, Endoscopic Retrograde, Protective Devices, thermoluminescence dosimetry, occupational radiation dose                                                                                                                                                                                                                                                                         |
|                                 |                                                                                                                                                                                                                                                                                                                                                                                                                                                            |

SCHOLARONE™  
Manuscripts



## Title Page

**Title:** Radiation Protection Effect of Mobile Shield Barrier for the Medical Personnel during Endoscopic Retrograde Cholangiopancreatography: a Quasi-experimental Prospective Study.

**Running title:** Mobile Shield Barrier for Medical Personnel during ERCP

### Authors

Kwang Hyun Chung, M.D

Department of Internal Medicine, Eulji General Hospital, Eulji University School of Medicine, Seoul, Republic of Korea.

E-mail: [kwasy@gmail.com](mailto:kwasy@gmail.com)

Young Sook Park, M.D, Ph.D.

Department of Internal Medicine, Eulji General Hospital, Eulji University School of Medicine, Seoul, Republic of Korea.

E-mail: [pys1109@eulji.ac.kr](mailto:pys1109@eulji.ac.kr)

Sang Bong Ahn, M.D, Ph.D.

Department of Internal Medicine, Eulji General Hospital, Eulji University School of Medicine, Seoul,

1  
2  
3  
4 Republic of Korea.  
5

6  
7 [dr486@eulji.ac.kr](mailto:dr486@eulji.ac.kr)  
8  
9

10  
11  
12  
13 Byoung Kwan Son, M.D, Ph.D.  
14

15  
16 Department of Internal Medicine, Eulji General Hospital, Eulji University School of Medicine, Seoul,  
17

18 Republic of Korea.  
19

20  
21 E-mail: [sbk1026@eulji.ac.kr](mailto:sbk1026@eulji.ac.kr)  
22  
23

24  
25  
26  
27 **Corresponding author**  
28

29  
30 Byoung Kwan Son, M.D, Ph.D.  
31

32  
33 Professor of Department of Internal Medicine,  
34

35  
36 Eulji Hospital, Eulji University College of Medicine,  
37

38  
39 68, Hangeulbiseok-ro, Nowon-gu, Seoul, Republic of Korea  
40

41  
42 Tel: +82--2-970-8209 / Fax: +82-2-970-8621  
43

44  
45 E-mail: [sbk1026@eulji.ac.kr](mailto:sbk1026@eulji.ac.kr)  
46  
47  
48  
49

50  
51 **Word counts**  
52

53  
54 Title: 115 characters (including spaces)  
55

56  
57 Abstract: 298 words  
58

Manuscript: 2596 words (excluding references)

## Abstract

**Objective:** To investigate the effectiveness of radiation protection offered by a newly designed mobile shield barrier for medical personnel during endoscopic retrograde cholangiopancreatography (ERCP).

**Design:** Quasi-experimental prospective study

**Setting:** ERCP procedures conducted between October 2016 to June 2017 at a single secondary referral hospital that performs approximately 250 therapeutic ERCP procedures annually.

**Interventions:** The mobile shield barrier was a custom-made 2 mmPb shielding plate (width: 120 cm, height: 190 cm) with a 0.5 mmPb window (width: 115 cm, height: 60 cm) on its upper part was used. Four wheels were attached to the bottom to allow easy moving.

**Primary and secondary outcome measures:** The radiation doses were measured during ERCP using personal thermoluminescence dosimetry badges (TLD) on both sides of the mobile shield barrier (patient's side: TLD1 and medical staff's side: TLD2). The radiation doses were also measured on the outer surface of the thyroid shield of the endoscopist (TLD3), and on the chest area inside the protective apron of the endoscopist (TLD4) and the main assistant (TLD5). The TLD was changed and reported once every 3 months. The radiation dose measured by TLD badges were compared.

**Results:** During the study period, a total of 128 ERCP procedures were performed. The mean fluoroscopy time per procedure was  $244.9 \pm 257.0$  seconds and the mean number of digital radiographs per procedure was  $3.7 \pm 1.0$ . TLD1 (outside the barrier) had a mean radiation dose of  $26.85 \pm 3.47$  mSv and all the other TLDs (inside the barrier) had less than 1 mSv ( $P < 0.001$ ). In the post hoc analysis, the difference between TLD1 and others showed a statistical significance; however, there were no significant differences between the TLDs inside the barrier.

**Conclusion:** Our mobile shield barrier was useful to reduce the radiation exposure of medical personnel

1  
2  
3  
4 during ERCP.  
5  
6  
7  
8  
9

## 10 **Article Summary**

### 13 **Strengths and limitations of this study:**

- 16 ● The newly designed mobile shield was easy to apply, and dose not interfere with the ERCP  
17 procedure.  
18
- 21 ● The newly designed mobile shield was shown to significantly reduce the occupational dose to  
22 the endoscopist  
23
- 26 ● The study period was relatively short (9 months) and the number of ERCP procedures was not  
27 very large.  
28
- 31 ● Comparisons of the radiation dose were performed only between the inside and outside of the  
32 mobile shield barrier and an independent control group was not established.  
33
- 36 ● The cumulative radiation dose was measured once every 3 months, without measuring the  
37 radiation dose for each ERCP procedure.  
38  
39

41 **Keywords:** Radiation Protection; Cholangiopancreatography, Endoscopic Retrograde; Protective  
42 Devices; thermoluminescence dosimetry; occupational radiation dose  
43  
44  
45  
46  
47  
48  
49  
50  
51  
52  
53  
54  
55  
56  
57

## INTRODUCTION

Endoscopic retrograde cholangiopancreatography (ERCP) and its related procedures inevitably use ionising radiation for imaging of the bile duct and pancreatic duct during the procedure, which poses a potential risk of radiation exposure of medical staff and patients[1]. Exposure of the human body to ionising radiation can result in damage to tissues and organs, and even with low levels of exposure may cause health problems, depending on the characteristics of each tissue[2]. Also, ionising radiation can cause genetic instability of cells, leading to cancer[3]. The patient gains direct benefit from the procedure and is exposed to radiation only few times, whereas the medical staff are repeatedly exposed to radiation; therefore, more attention must be given to radiation protection for medical staff. To minimize the radiation exposure to patients and medical staff, the ALARA principle (as low as reasonably achievable) should be strictly followed and continuous monitoring of radiation exposure is required[4]. The International Commission on Radiological Protection (ICRP) recommends a maximum safe limit for the effective dose of 20 mSv/year (averaged over a defined 5-year period with no single year exceeding 50 mSv) for the whole body as well as for the eye,[5] and the Institute of Nuclear Safety of the Republic of Korea also applies this recommendation for the radiation dose limit for occupational exposure in planned exposure situations.

There are several factors that affect the radiation exposure of medical staff during ERCP, one of which is the use of personal protective equipment and radiation protection shields[6]. However, use of these protection devices are often overlooked due to lack of awareness of radiation hazards and the discomfort of using protective devices. According to a survey conducted in the Republic of Korea in 2011, only 52.5% of endoscopists responded that they always wore thyroid shield, and 26.9% of them rarely or never wore it. Moreover, only 14% wore lead glasses during the procedure and 69% never wore it and the usage rates of mobile shields or lead curtains were only 14% and 24%, respectively[7]. This propensity had not improved remarkably when a similar survey was conducted again in 2013[8]. It would be possible to reduce this tendency by creating shielding barriers that are easy to use and have

1  
2  
3  
4 excellent protection capabilities. Therefore, a mobile shield barrier was designed that could be placed  
5  
6 between the patient and the medical staff while the fluoroscopy is being employed. The mobile barrier  
7  
8 had the ability to shield the entire body of the medical staff during ERCP. The aim of this study was to  
9  
10 verify the effectiveness of our mobile shield barrier.  
11  
12  
13  
14  
15

## 16 **MATERIALS AND METHODS**

### 17 **Study design**

18  
19  
20 This prospective quasi-experimental study was conducted in a secondary referral hospital which  
21  
22 performs about 250 therapeutic ERCPs annually. The study period was between October 2016 and June  
23  
24 2017 and all the patients were over 18 years of age. Information including patient demographics,  
25  
26 indications for ERCP, fluoroscopy time and number of digital radiographs was recorded at the time of  
27  
28 the procedure. During the study period, radiation exposure doses to inner and outer surface of mobile  
29  
30 shield barrier and medical staff in the ERCP room were measured at every therapeutic ERCP procedures.  
31  
32 The study was approved by the Institutional Review Board (protocol number: EMCIRB 2017-07-013)  
33  
34 of Eulji Hospital. The study was investigator-initiated and received no external funding.  
35  
36  
37  
38  
39  
40  
41  
42  
43

### 44 **Endoscopic retrograde cholangiopancreatography**

45  
46 All procedures were performed by using a Sonialvision Safire 17 fluoroscopy system (Shimadzu, Japan)  
47  
48 which is an over-couch X-ray system comprising a digital table (ZS-100i, Shimadzu, Japan, width: 76.5  
49  
50 cm, height: 235 cm) and a high voltage X-ray generator (UD150BC-40, Shimadzu, Japan, 80kW)  
51  
52 installed in 2011. The fluoroscopy mode was set as pulsed fluoroscopy with a rate of 30 frames per  
53  
54 second. Fluoroscopy time was displayed on the monitor of the fluoroscopy controller. The entire ERCP  
55  
56 procedure was performed under fluoroscopic guidance using a standard side-view duodenoscope (TJF-  
57  
58  
59  
60

1  
2  
3  
4 240, Olympus, Tokyo, Japan). One experienced endoscopist (BKS) performed all ERCP procedures  
5  
6 and two assistants participated in each ERCP procedure. A total of four assistants participated  
7  
8 alternately during the study period. There was no additional lead shielding in our ERCP room.  
9

### 10 11 12 13 14 **Mobile shield barrier**

15  
16  
17 The mobile shield barrier was a custom-made 2 mmPb shield plate (width: 120 cm, height: 190 cm)  
18  
19 with a 0.5 mmPb window (width: 115 cm, height: 60 cm) on the upper part. Four wheels were attached  
20  
21 to the bottom to allow for easy moving. In order to facilitate the duodenoscope manipulation, a notch  
22  
23 through which the shaft of the endoscope can be inserted was made on the side of the barrier. This  
24  
25 mobile shield barrier was placed between patient and the medical staff, including the endoscopist and  
26  
27 the assisting nurse while the fluoroscopy was employed (**Figure 1**). While not using the fluoroscopy,  
28  
29 the mobile shield barrier was moved slightly to the left as not to interfere with the duodenoscope  
30  
31 manipulation and is located at the patient's waist level. Each medical staff member wore a lead wrap-  
32  
33 around protective apron (0.35-mm Pb), a thyroid shield (lead collar, 0.35-mm Pb), and lead goggles  
34  
35 (0.75-mm Pb).  
36  
37  
38  
39  
40  
41  
42

### 43 **Outcome measurement**

44  
45 The radiation exposure doses were measured by personal thermoluminescence dosimetry (TLD) badges  
46  
47 (InLight® Quixel, Hanil Nuclear Co., Ltd., Republic of Korea) and were changed and reported every 3  
48  
49 months according to the Regulations for Safety Management of Diagnostic Radiation of the National  
50  
51 Dose Registry (NDR), a part of the Korea Centers for Disease Control and Prevention (KCDC).

52  
53  
54 TLD badges were attached to the surface of the patient's side (TLD1) and the medical staff's side (TLD2)  
55  
56 of the mobile shield barrier at the level of the medical staff's neck. TLD3 was attached on the outer  
57  
58

1  
2  
3  
4 surface of thyroid shield of endoscopist, and TLD4 and TLD5 were placed inside the protective apron  
5  
6 at the level of the chest of endoscopist and that of the main assistant. The primary outcome of the study  
7  
8 was the radiation dose measured by the TLD badge. TLD1 and TLD2 are almost in the same position,  
9  
10 but TLD1 is closer to the x-ray generator by about 1 cm due to the thickness of the mobile shield barrier.  
11  
12  
13  
14  
15

### 16 **Statistical analysis**

17  
18  
19 Data are shown as the number (%) for categorical variables and the mean ( $\pm$  SD) for continuous  
20  
21 variables. To compare the characteristics of the study groups, the chi-squared test or Fisher's exact test  
22  
23 was used for categorical variables and the Student's t test was used for the continuous variables to  
24  
25 compare two groups. We used one-way analysis of variance, followed by a post hoc analysis using  
26  
27 pairwise comparisons with Bonferroni adjustment to compare three or more groups, where appropriate.  
28  
29 Double-sided *P*-values of  $< 0.05$  were considered statistically significant. All statistical analyses were  
30  
31 conducted using the R software (R for Windows 3.5.1; The R Foundation for Statistical Computing,  
32  
33 Vienna, Austria).  
34  
35  
36  
37  
38  
39

### 40 **Patient and public involvement**

41  
42  
43 This research was done without patient involvement. Patients were not invited to comment on the  
44  
45 study design and were not consulted to develop patient relevant outcomes or interpret the results.  
46  
47 Patients were not invited to contribute to the writing or editing of this document for readability or  
48  
49 accuracy.  
50  
51  
52  
53  
54

## 55 **RESULTS**



## Patients and procedure details

Patient characteristics and procedure details are described in **Table 1**.

**Table 1.** Patient and Procedural Characteristics

|                                                   | <b>Total</b>     | <b>1–3<br/>Months</b> | <b>4–6<br/>Months</b> | <b>7–9<br/>Months</b> | <b>P-value</b> |
|---------------------------------------------------|------------------|-----------------------|-----------------------|-----------------------|----------------|
| <b>N</b>                                          | 128              | 43                    | 47                    | 38                    |                |
| <b>Age (years) (mean ± SD)</b>                    | 69.6 ± 14.5      | 69.6 ± 11.9           | 68.7 ± 16.1           | 70.7 ± 15.2           | 0.818          |
| <b>Sex</b>                                        |                  |                       |                       |                       | 0.248          |
| Male                                              | 49 (39.1%)       | 17 (39.5%)            | 14 (29.8%)            | 18 (47.4%)            |                |
| Female                                            | 79 (61.7%)       | 26 (60.5%)            | 33 (70.2%)            | 20 (52.6%)            |                |
| <b>Indications for ERCP<br/>(no, %)</b>           |                  |                       |                       |                       | 0.541          |
| Bile duct stone                                   | 78 (60.9%)       | 27 (62.8%)            | 30 (63.8%)            | 21 (55.3%)            |                |
| Bile duct cancer                                  | 17 (13.3%)       | 6 (14.0%)             | 3 (6.4%)              | 8 (21.1%)             |                |
| Pancreatic cancer                                 | 4 (3.1%)         | 0 (0.0%)              | 2 (4.3%)              | 2 (5.3%)              |                |
| Pancreatitis                                      | 4 (3.1%)         | 2 (4.7%)              | 1 (2.1%)              | 1 (2.6%)              |                |
| Others                                            | 25 (19.5%)       | 8 (18.6%)             | 11 (23.4%)            | 6 (15.8%)             |                |
| <b>Fluoroscopy time<br/>(seconds) (mean ± SD)</b> | 244.9 ±<br>257.0 | 254.6 ±<br>354.5      | 194.9 ±<br>156.9      | 295.7 ±<br>217.7      | 0.191          |
| <b>No. of digital radiographs<br/>(mean ± SD)</b> | 3.7 ± 1.0        | 3.8 ± 1.2             | 3.3 ± 0.8             | 4.2 ± 0.9             | < 0.001        |

During the study period, a total of 128 ERCP procedures were performed. The mean age of patients were 69.6 ± 14.5 years. The indication for ERCP was mostly choledocholithiasis (60.9%). The mean fluoroscopy time per procedure was 244.9 ± 257.0 seconds and the mean number of digital radiographs

per procedure was  $3.7 \pm 1.0$ . The patient age, sex, and indications for ERCP were not significantly different in each 3-month period.

### Cumulative radiation exposure

The cumulative radiation exposure of each 3-month period is presented in **Table 2**.

**Table 2.** Radiation Exposure

|                                                                               | <b>1–3</b>    | <b>4–6</b>    | <b>7–9</b>    |
|-------------------------------------------------------------------------------|---------------|---------------|---------------|
|                                                                               | <b>Months</b> | <b>Months</b> | <b>Months</b> |
| <b>Number of ERCP procedure</b>                                               | 43            | 47            | 38            |
| <b>Cumulative fluoroscopy time</b>                                            | 10949         | 9160          | 5966          |
| <b>Cumulative number of digital radiographs</b>                               | 165           | 153           | 158           |
| <b>Radiation dose (TLD1) (mSv)</b><br>– barrier surface, patient’s side       | 30.69         | 25.89         | 23.96         |
| <b>Radiation dose (TLD2) (mSv)</b><br>– barrier surface, medical staff’s side | 1.50          | 0.25          | 0.22          |
| <b>Radiation dose (TLD3) (mSv)</b><br>- on the thyroid shield                 | 0.34          | 0.16          | 0.15          |
| <b>Radiation dose (TLD4) (mSv)</b><br>- inside the lead apron, endoscopist    | 0.33          | 0.12          | 0.09          |
| <b>Radiation dose (TLD5) (mSv)</b><br>- inside the lead apron, nurse          | 0.14          | 0.10          | 0.08          |

The cumulative fluoroscopy time and digital radiograph number as well as the TLD doses were highest in the first 3-month period. The mean TLD result of each location is presented in **Figure 2**. TLD1

1  
2  
3  
4 (outside the barrier) had a mean radiation dose of  $26.85 \pm 3.47$  mSv and all the rest of TLDs (inside the  
5  
6 barrier) were less than 1 mSv ( $P < 0.001$ ). In the post hoc analysis, the difference between TLD1 and  
7  
8 the others showed statistical significance ( $P < 0.001$ ); however, there were no significant differences  
9  
10 between the TLDs inside the barrier ( $P = 1.000$ ).  
11  
12  
13  
14  
15

## 16 **DISCUSSION**

17  
18  
19  
20 Several methods are used for protecting medical personnel from radiation during ERCP, and personal  
21  
22 protective equipment is one of the methods[6]. Personal protective equipment, however, does not cover  
23  
24 the entire body; moreover, its heavy weight can cause musculoskeletal disorders and can sometimes be  
25  
26 disregarded due to discomfort[6,7]. In this study, we showed that the amount of radiation reaching the  
27  
28 medical staff can be drastically reduced by using a mobile shield barrier. Moreover, from the inside the  
29  
30 mobile shield barrier, there was no significant difference between the radiation doses reaching the inside  
31  
32 and outside of the personal protective equipment.  
33  
34

35  
36 The idea of using a protective shield to protect medical staff from radiation during ERCP has been  
37  
38 around for a long time. In 1996, Chen et al.[9] attempted to reduce the radiation exposure of medical  
39  
40 personnel by using a 0.5 mm lead acrylic shield that hangs from the ceiling and could be placed between  
41  
42 the patient and the endoscopist, which significantly reduced the radiation exposure of the endoscopist  
43  
44 from 2.5 mR to 0.27 mR per procedure. In 2002, Johlin et al.[10] used a phantom model to demonstrate  
45  
46 that a curtain of beads fashioned as a shield could reduce the radiation exposure of medical staff during  
47  
48 ERCP. More recently, in 2011, Kim et al.[11] used a curtain-shaped protective shield composed of  
49  
50 seven movable lead plates to reduce radiation. Several other studies have attempted to attach lead  
51  
52 shields directly to X-ray tubes[12-14] or image intensifiers[15]. The above-mentioned studies  
53  
54 commonly used a method of hanging a radiation protective shield from above, similar to a curtain. In  
55  
56 contrast, our protective shield is set on the floor which has less weight-related constraints; thus, we are  
57  
58  
59  
60

1  
2  
3  
4 able to utilise a shield that is bigger than that used in previous studies to cover a wider range. Although  
5  
6 no direct comparison with other shielding devices has been performed, the theoretical advantage of a  
7  
8 bigger size of our mobile shield barrier is that it will be able to shield scattered waves from more diverse  
9  
10 angles and ranges. Another point to consider is that manipulation of the duodenoscope may be  
11  
12 interrupted by the shielding barrier. This problem was solved by putting wheels on the bottom of the  
13  
14 shield barrier to allow easy movement of the shield and a small notch was incorporated on the side to  
15  
16 acquire space for movement of the duodenoscope shaft. The shield barrier was placed between the  
17  
18 patient and medical staff only when using the fluoroscopy; during most of the time that the  
19  
20 duodenoscope was manipulated, the shield barrier was moved slightly to one side so as not to interfere  
21  
22 with the duodenoscope manipulation. In addition, ancillary effects are expected to reduce unnecessary  
23  
24 fluoroscopy time.  
25  
26

27  
28 The amount of radiation the medical staff receives over a period is affected by various factors. The  
29  
30 physical environment of the ERCP unit, the distance between medical staff and the radiation source or  
31  
32 the patient, the type of X-ray system (over-couch, under-couch, or mobile C-arm unit), the fluoroscopy  
33  
34 parameters (use of pulsed rather than continuous fluoroscopy, use of lower frame rates of fluoroscopy,  
35  
36 number of radiographs, use of collimation of X-ray beam, use of low magnification), and the use of  
37  
38 protective equipment can affect the radiation dose[6,16-19]. Moreover, the fluoroscopy time is  
39  
40 determined by important factors such as the difficulty of the procedure,[20,21] the proficiency level of  
41  
42 the endoscopist and the assistant,[22] education and awareness regarding radiation protection,[23,24]  
43  
44 and the number of ERCP procedures during the period. Hence, the different scenarios at each institution  
45  
46 and those of the ERCP units should be taken into account when comparing the degree of radiation  
47  
48 exposure for each institution. Our institution is using an over-couch X-ray system, in which the amount  
49  
50 of radiation received by medical staff is known to be higher than under-couch X-ray systems, especially  
51  
52 on the thyroid gland and eyes, which is vulnerable to radiation[6]. Therefore, the radiation protection  
53  
54 of medical staff should be more thorough.  
55  
56  
57  
58  
59  
60

1  
2  
3  
4 The fluoroscopy time per procedure in our study is approximately 4 minutes which is not significantly  
5  
6 different from the fluoroscopy times of previous studies (5.32 to 14.5 minutes)[12,15,16]. The actual  
7  
8 radiation dose received by medical personnel may differ from the radiation dose measured by the TLD;  
9  
10 nonetheless, the radiation dose outside the mobile shield barrier exceeded 80 mSv only in 9 months.  
11  
12 According to the results of our study alone, the amount of radiation exposure in areas without protective  
13  
14 equipment is more than 150 mSv which exceeding the ICRP limits[5] when we perform 250 ERCPs  
15  
16 per year without shielding barriers. As this level is high, a more aggressive protection strategy is  
17  
18 warranted, and our mobile shield barrier could be a possible solution by reducing the radiation exposure  
19  
20 to less than 4 mSv/year which far below the ICRP limit[5].  
21  
22

23  
24 Our study had a few limitations. Our study was conducted for a relatively short period of 9 months and  
25  
26 the number of ERCPs was not very large. In addition, only the radiation dose inside and outside the  
27  
28 mobile shield barrier was compared without setting the independent control group without a mobile  
29  
30 shield barrier or with different type of shield. The total procedure time and complication rate were not  
31  
32 investigated and comparisons of those between with and without mobile shield barrier were not  
33  
34 performed. However, we showed reduction of the radiation dose by approximately 1/40 using the  
35  
36 mobile shield barrier, which demonstrates remarkable efficacy and not only just a statistical difference.  
37  
38 Moreover, the radiation doses between the TLDs inside the mobile shield barrier were not significantly  
39  
40 different, and this can help reduce the role of personal protective equipment. In the case of the total  
41  
42 procedure time, considering that the mobile shield barrier was only used during the fluoroscopy was  
43  
44 working, the impact on the total operation time was not considered to be significant, and fluoroscopy  
45  
46 time did not differ much from other studies. Perhaps the time to move the mobile shield barrier to the  
47  
48 left or right may be added, but it takes less than 5 seconds. During the study period, there were no major  
49  
50 complications such as clinically significant bleeding or perforation. There were several mild post-ERCP  
51  
52 pancreatitis occurred, but no severe pancreatitis was occurred. Considering that the main cause of  
53  
54 pancreatitis is pancreatic duct injury and edema of papilla, most of them will occur while attempting  
55  
56  
57  
58  
59  
60

1  
2  
3  
4 ductal cannulation which is not the mobile shield barrier was using[25]. Therefore, we think that the  
5  
6 impact of mobile shield barrier to the post- ERCP pancreatitis would be minimal.  
7  
8

9 Compared to the previous protective shields, the improvement of our mobile shield barrier is that it  
10  
11 could have a bigger size because it is set on the floor. It covers wider range and does not interfere with  
12  
13 the procedure. And because it is not attached to wall, ceiling, fluoroscopy tube or table, it is easy to  
14  
15 install and easy to remove. In conclusion, radiation exposure is inevitable during ERCP and this can  
16  
17 cause various health problems in medical personnel. It is essential to lower the radiation exposure by  
18  
19 as much as possible and various protective equipment or devices should be used appropriately. The  
20  
21 newly designed mobile shield barrier was found to be extremely effective in reducing radiation exposure  
22  
23 and could be one of the options for protecting medical personnel from radiation exposure during ERCP.  
24  
25 It may be used for other fluoroscopic procedures, such as endoscopic pyloric stenting or colonic stenting  
26  
27 and further research is needed.  
28  
29  
30  
31  
32  
33

## 34 **ACKNOWLEDGMENTS**

35  
36  
37 None  
38  
39  
40  
41  
42

## 43 **STATEMENT OF COMPETING INTERESTS**

44  
45  
46  
47 None declared  
48  
49  
50  
51

## 52 **FUNDING**

53  
54  
55  
56 This research received no specific grant from any funding agency in the public, commercial or not-for-  
57  
58  
59  
60

1  
2  
3  
4 profit sectors.  
5  
6  
7  
8  
9

## 10 **AUTHOR CONTRIBUTIONS**

11  
12  
13 BKS contributed to the concept and design of the study. He also drafted the initial manuscript. KHC  
14 critically reviewed the research protocol and contributed to analyzing of data and writing of the  
15 manuscript. YSP and SBA contributed to the data interpretation, and critically revised the manuscript.  
16  
17  
18 All authors were involved in editing the manuscript. All authors read and approved the final manuscript.  
19  
20  
21  
22  
23  
24  
25

### 26 **Patient consent**

27 Not required.  
28  
29  
30

---

## 31 **ETHICAL APPROVAL**

32  
33  
34  
35 The study protocol was approved by the institutional review board of Eulji General Hospital (protocol  
36 number: EMCIRB 2017-07-013).  
37  
38  
39  
40  
41  
42  
43  
44  
45

## 46 **DATA SHARING STATEMENT**

47  
48  
49 All available data can be obtained from the corresponding author.  
50  
51  
52  
53  
54  
55

## 56 **References**

1. Tsapaki V, Paraskeva KD, Mathou N, et al. Patient and endoscopist radiation doses during ERCP procedures. *Radiat Prot Dosimetry* 2011;147:111-3.
2. Authors on behalf of I, Stewart FA, Akleyev AV, et al. ICRP publication 118: ICRP statement on tissue reactions and early and late effects of radiation in normal tissues and organs-- threshold doses for tissue reactions in a radiation protection context. *Ann ICRP* 2012;41:1-322.
3. Richardson DB, Cardis E, Daniels RD, et al. Risk of cancer from occupational exposure to ionising radiation: retrospective cohort study of workers in France, the United Kingdom, and the United States (INWORKS). *BMJ* 2015;351:h5359.
4. Campbell N, Sparrow K, Fortier M, et al. Practical radiation safety and protection for the endoscopist during ERCP. *Gastrointest Endosc* 2002;55:552-7.
5. Rehani M, Ciraj-Bjelac O, Vaño E, et al. Radiological protection in fluoroscopically guided procedures performed outside the imaging department. *Annals of the ICRP* 2010;40:1-102.
6. Dumonceau JM, Garcia-Fernandez FJ, Verdun FR, et al. Radiation protection in digestive endoscopy: European Society of Digestive Endoscopy (ESGE) guideline. *Endoscopy* 2012;44:408-21.
7. Son BK, Lee KT, Kim JS, et al. Lack of radiation protection for endoscopists performing endoscopic retrograde cholangiopancreatography. *Korean J Gastroenterol* 2011;58:93-9.
8. Shin JM, Lee TH, Park SH, et al. A Survey of the Radiation Exposure Protection of Health Care Providers during Endoscopic Retrograde Cholangiopancreatography in Korea. *Gut Liver* 2013;7:100-5.
9. Chen MY, Van Swearingen FL, Mitchell R, et al. Radiation exposure during ERCP: effect of a protective shield. *Gastrointest Endosc* 1996;43:1-5.
10. Johlin FC, Pelsang RE, Greenleaf M. Phantom study to determine radiation exposure to medical personnel involved in ERCP fluoroscopy and its reduction through equipment and behavior modifications. *Am J Gastroenterol* 2002;97:893-7.
11. Kim YJ, Cho KB, Kim ES, et al. [Efficacy of a self-designed protective lead shield in reduction of radiation exposure dose during endoscopic retrograde cholangiopancreatography]. *Korean J Gastroenterol* 2011;57:28-33.
12. Minami T, Sasaki T, Serikawa M, et al. Occupational Radiation Exposure during Endoscopic Retrograde Cholangiopancreatography and Usefulness of Radiation Protective Curtains. *Gastroenterol Res Pract* 2014;2014:926876.
13. Mori H, Koshida K, Ishigamori O, et al. A novel removable shield attached to C-arm units against scattered X-rays from a patient's side. *Eur Radiol* 2014;24:1794-9.
14. Morishima Y, Chida K, Meguro T. Effectiveness of additional lead shielding to protect staff from scattering radiation during endoscopic retrograde cholangiopancreatography procedures. *J Radiat Res* 2018;59:225-32.



15. Muniraj T, Aslanian HR, Laine L, et al. A double-blind, randomized, sham-controlled trial of the effect of a radiation-attenuating drape on radiation exposure to endoscopy staff during ERCP. *Am J Gastroenterol* 2015;110:690-6.
16. Jowhari F, Hopman WM, Hookey L. A simple ergonomic measure reduces fluoroscopy time during ERCP: A multivariate analysis. *Endosc Int Open* 2017;5:E172-E8.
17. Churrango G, Deutsch JK, Dinneen HS, et al. Minimizing Radiation Exposure During ERCP by Avoiding Live or Continuous Fluoroscopy. *J Clin Gastroenterol* 2015;49:e96-100.
18. Tsapaki V, Paraskeva KD, Tsalafoutas IA, et al. The Impact of X-Ray Unit Type Used for Endoscopic Retrograde Cholangiopancreatography Procedures on Patient Doses. *Radiat Prot Dosimetry* 2016;171:503-8.
19. Boland GW, Murphy B, Arellano R, et al. Dose reduction in gastrointestinal and genitourinary fluoroscopy: use of grid-controlled pulsed fluoroscopy. *AJR Am J Roentgenol* 2000;175:1453-7.
20. Saukko E, Gronroos JM, Salminen P, et al. Patient radiation dose and fluoroscopy time during ERCP: a single-center, retrospective study of influencing factors. *Scand J Gastroenterol* 2018;53:495-504.
21. Hayashi S, Nishida T, Matsubara T, et al. Radiation exposure dose and influencing factors during endoscopic retrograde cholangiopancreatography. *PLoS One* 2018;13:e0207539.
22. Liao C, Thosani N, Kothari S, et al. Radiation exposure to patients during ERCP is significantly higher with low-volume endoscopists. *Gastrointest Endosc* 2015;81:391-8 e1.
23. Barakat MT, Thosani NC, Huang RJ, et al. Effects of a Brief Educational Program on Optimization of Fluoroscopy to Minimize Radiation Exposure During Endoscopic Retrograde Cholangiopancreatography. *Clin Gastroenterol Hepatol* 2018;16:550-7.
24. Zeng HZ, Liu Q, Chen HL, et al. A pilot single-center prospective randomized trial to assess the short-term effect of a flashing warning light on reducing fluoroscopy time and radiation exposure during ERCP. *Gastrointest Endosc* 2018;88:261-6.
25. Tryliskyy Y, Bryce GJ. Post-ERCP pancreatitis: Pathophysiology, early identification and risk stratification. *Adv Clin Exp Med* 2018;27:149-54.

## Figure legends

**Figure 1.** ERCP room and mobile shield barrier. (a) Size and shape of mobile shield barrier. (b) Arrangement of fluoroscopy tube, table, endoscopic instruments, and mobile shield barrier in the ERCP room. Locations of thermoluminescence dosimetry badges are indicated by circled numbers. E: endoscopist, A: assistant. (c) Photo of ERCP room and mobile shield barrier.

**Figure 2.** Box plot of thermoluminescence dosimetry value at different locations. Each number represents the mean value.

**Figure 1**

1  
2  
3  
4  
5  
6  
7  
8  
9  
10  
11  
12  
13  
14  
15  
16  
17  
18  
19  
20  
21  
22  
23  
24  
25  
26  
27  
28  
29  
30  
31  
32  
33  
34  
35  
36  
37  
38  
39  
40  
41

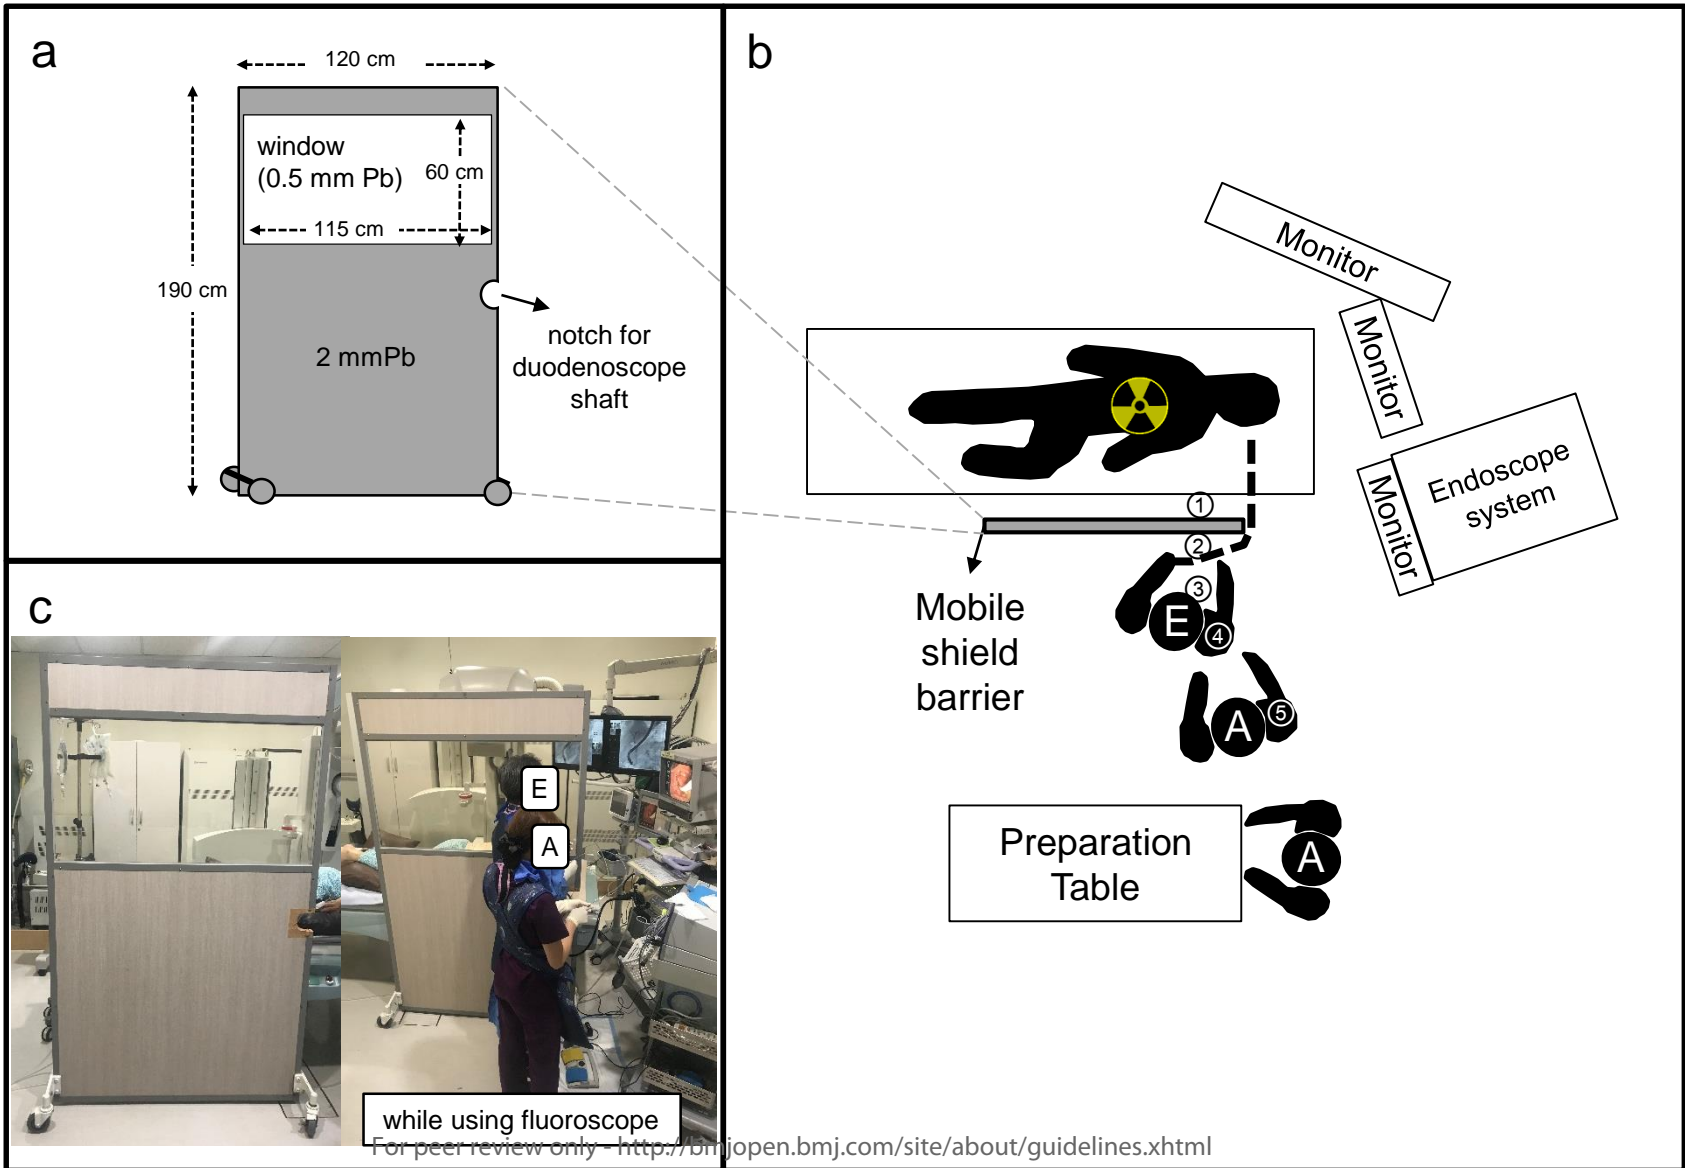

1  
2  
3  
4  
5  
6  
7  
8  
9  
10  
11  
12  
13  
14  
15  
16  
17  
18  
19  
20  
21  
22  
23  
24  
25  
26  
27  
28  
29  
30  
31  
32  
33  
34  
35  
36  
37  
38  
39  
40  
41



**P-values of pairwise comparisons using Bonferroni adjustment**  
 TLD 1 vs. TLD 2, TLD 1 vs. TLD 3, TLD 1 vs. TLD 4, TLD 1 vs. TLD 5;  $P < 0.001$   
 TLD 2 vs. TLD 3, TLD 2 vs. TLD 4, TLD 2 vs. TLD 5;  $P = 1.000$   
 TLD 3 vs. TLD 4, TLD 3 vs. TLD 5;  $P = 1.000$   
 TLD 4 vs. TLD 5;  $P = 1.000$

**STROBE 2007 (v4) checklist of items to be included in reports of observational studies in epidemiology\***  
**Checklist for cohort, case-control, and cross-sectional studies (combined)**

| Section/Topic             | Item # | Recommendation                                                                                                                                                                                                                                                                                                                                                                                                                                                         | Reported on page # |
|---------------------------|--------|------------------------------------------------------------------------------------------------------------------------------------------------------------------------------------------------------------------------------------------------------------------------------------------------------------------------------------------------------------------------------------------------------------------------------------------------------------------------|--------------------|
| Title and abstract        | 1      | (a) Indicate the study's design with a commonly used term in the title or the abstract                                                                                                                                                                                                                                                                                                                                                                                 | #3                 |
|                           |        | (b) Provide in the abstract an informative and balanced summary of what was done and what was found                                                                                                                                                                                                                                                                                                                                                                    | #3                 |
| <b>Introduction</b>       |        |                                                                                                                                                                                                                                                                                                                                                                                                                                                                        |                    |
| Background/rationale      | 2      | Explain the scientific background and rationale for the investigation being reported                                                                                                                                                                                                                                                                                                                                                                                   | #5                 |
| Objectives                | 3      | State specific objectives, including any pre-specified hypotheses                                                                                                                                                                                                                                                                                                                                                                                                      | #5-6               |
| <b>Methods</b>            |        |                                                                                                                                                                                                                                                                                                                                                                                                                                                                        |                    |
| Study design              | 4      | Present key elements of study design early in the paper                                                                                                                                                                                                                                                                                                                                                                                                                | #6                 |
| Setting                   | 5      | Describe the setting, locations, and relevant dates, including periods of recruitment, exposure, follow-up, and data collection                                                                                                                                                                                                                                                                                                                                        | #6                 |
| Participants              | 6      | (a) <i>Cohort study</i> —Give the eligibility criteria, and the sources and methods of selection of participants. Describe methods of follow-up<br><i>Case-control study</i> —Give the eligibility criteria, and the sources and methods of case ascertainment and control selection. Give the rationale for the choice of cases and controls<br><i>Cross-sectional study</i> —Give the eligibility criteria, and the sources and methods of selection of participants | #7                 |
|                           |        | (b) <i>Cohort study</i> —For matched studies, give matching criteria and number of exposed and unexposed<br><i>Case-control study</i> —For matched studies, give matching criteria and the number of controls per case                                                                                                                                                                                                                                                 | N/A                |
| Variables                 | 7      | Clearly define all outcomes, exposures, predictors, potential confounders, and effect modifiers. Give diagnostic criteria, if applicable                                                                                                                                                                                                                                                                                                                               | #7                 |
| Data sources/ measurement | 8*     | For each variable of interest, give sources of data and details of methods of assessment (measurement). Describe comparability of assessment methods if there is more than one group                                                                                                                                                                                                                                                                                   | #7                 |
| Bias                      | 9      | Describe any efforts to address potential sources of bias                                                                                                                                                                                                                                                                                                                                                                                                              | N/A                |
| Study size                | 10     | Explain how the study size was arrived at                                                                                                                                                                                                                                                                                                                                                                                                                              | N/A                |
| Quantitative variables    | 11     | Explain how quantitative variables were handled in the analyses. If applicable, describe which groupings were chosen and why                                                                                                                                                                                                                                                                                                                                           | #7-8               |
| Statistical methods       | 12     | (a) Describe all statistical methods, including those used to control for confounding                                                                                                                                                                                                                                                                                                                                                                                  | #7-8               |
|                           |        | (b) Describe any methods used to examine subgroups and interactions                                                                                                                                                                                                                                                                                                                                                                                                    | N/A                |
|                           |        | (c) Explain how missing data were addressed                                                                                                                                                                                                                                                                                                                                                                                                                            | N/A                |
|                           |        | (d) <i>Cohort study</i> —If applicable, explain how loss to follow-up was addressed<br><i>Case-control study</i> —If applicable, explain how matching of cases and controls was addressed                                                                                                                                                                                                                                                                              | N/A                |

|                          |     |                                                                                                                                                                                                              |        |
|--------------------------|-----|--------------------------------------------------------------------------------------------------------------------------------------------------------------------------------------------------------------|--------|
|                          |     | <i>Cross-sectional study</i> —If applicable, describe analytical methods taking account of sampling strategy                                                                                                 |        |
|                          |     | (e) Describe any sensitivity analyses                                                                                                                                                                        | N/A    |
| <b>Results</b>           |     |                                                                                                                                                                                                              |        |
| Participants             | 13* | (a) Report numbers of individuals at each stage of study—eg numbers potentially eligible, examined for eligibility, confirmed eligible, included in the study, completing follow-up, and analysed            | #8-9   |
|                          |     | (b) Give reasons for non-participation at each stage                                                                                                                                                         | N/A    |
|                          |     | (c) Consider use of a flow diagram                                                                                                                                                                           | N/A    |
| Descriptive data         | 14* | (a) Give characteristics of study participants (eg demographic, clinical, social) and information on exposures and potential confounders                                                                     | #8-10  |
|                          |     | (b) Indicate number of participants with missing data for each variable of interest                                                                                                                          | #8     |
|                          |     | (c) <i>Cohort study</i> —Summarise follow-up time (eg, average and total amount)                                                                                                                             | N/A    |
| Outcome data             | 15* | <i>Cohort study</i> —Report numbers of outcome events or summary measures over time                                                                                                                          | #9-11  |
|                          |     | <i>Case-control study</i> —Report numbers in each exposure category, or summary measures of exposure                                                                                                         |        |
|                          |     | <i>Cross-sectional study</i> —Report numbers of outcome events or summary measures                                                                                                                           |        |
| Main results             | 16  | (a) Give unadjusted estimates and, if applicable, confounder-adjusted estimates and their precision (eg, 95% confidence interval). Make clear which confounders were adjusted for and why they were included | #9-11  |
|                          |     | (b) Report category boundaries when continuous variables were categorized                                                                                                                                    | #9-11  |
|                          |     | (c) If relevant, consider translating estimates of relative risk into absolute risk for a meaningful time period                                                                                             | N/A    |
| Other analyses           | 17  | Report other analyses done—eg analyses of subgroups and interactions, and sensitivity analyses                                                                                                               | N/A    |
| <b>Discussion</b>        |     |                                                                                                                                                                                                              |        |
| Key results              | 18  | Summarise key results with reference to study objectives                                                                                                                                                     | #11    |
| Limitations              | 19  | Discuss limitations of the study, taking into account sources of potential bias or imprecision. Discuss both direction and magnitude of any potential bias                                                   | #13-14 |
| Interpretation           | 20  | Give a cautious overall interpretation of results considering objectives, limitations, multiplicity of analyses, results from similar studies, and other relevant evidence                                   | #11-14 |
| Generalisability         | 21  | Discuss the generalisability (external validity) of the study results                                                                                                                                        | #11-14 |
| <b>Other information</b> |     |                                                                                                                                                                                                              |        |
| Funding                  | 22  | Give the source of funding and the role of the funders for the present study and, if applicable, for the original study on which the present article is based                                                | #15    |

\*Give information separately for cases and controls in case-control studies and, if applicable, for exposed and unexposed groups in cohort and cross-sectional studies.

**Note:** An Explanation and Elaboration article discusses each checklist item and gives methodological background and published examples of transparent reporting. The STROBE checklist is best used in conjunction with this article (freely available on the Web sites of PLoS Medicine at <http://www.plosmedicine.org/>, Annals of Internal Medicine at <http://www.annals.org/>, and Epidemiology at <http://www.epidem.com/>). Information on the STROBE Initiative is available at [www.strobe-statement.org](http://www.strobe-statement.org).
